# Supplementary material
Source: PubMed Central journal article supplement (PMC7261372)
Supplement: NIHMS1579586-supplement-2.pdf [file NIHMS1579586-supplement-2.pdf]

73. H. S. Kim, J. M. Oh, D. H. Jin, K. H. Yang, E. Y. Moon, Paclitaxel induces vascular endothelial growth factor expression through reactive oxygen species production. *Pharmacology* 81, 317-324 (2008).
74. B. Krishnamachary et al., Hypoxia regulates CD44 and its variant isoforms through HIF-1alpha in triple negative breast cancer. *PLoS One* 7, e44078 (2012).
75. M. Tamada et al., Modulation of glucose metabolism by CD44 contributes to antioxidant status and drug resistance in cancer cells. *Cancer Res* 72, 1438-1448 (2012).
76. A. M. George Thompson, C. V. Iancu, T. T. Nguyen, D. Kim, J. Y. Choe, Inhibition of human GLUT1 and GLUT5 by plant carbohydrate products; insights into transport specificity. *Scientific reports* 5, 12804 (2015)
